# Supplementary material for: The membrane-associated proteins FCHo and SGIP are allosteric activators of the AP2 clathrin adaptor complex
Source: eLife journal article supplement (doi:10.7554/elife.03648), 2014-10-10
Supplement: supp [file elife_poa_e03648_Figure_1_figure_supplement_2.doc]

Figure 1-figure supplement 2. Recessive Alleles Isolated from Genetic Screen for “jowls” Phenotype

| gene | allele | mutation | protein | effect |
| --- | --- | --- | --- | --- |
| *apm-2* | *ox499* | atG to atA | mu2 (AP2) | removes start |
| *apm-2* | *ox546* | tgG to tgA | mu2 (AP2) | W64stop |
| *apm-2* | *ox501* | Cga to Tga | mu2 (AP2) | R174stop |
| *apm-2* | (lost) | tGg to tAg | mu2 (AP2) | W427stop |
| *apa-2* | *ox502* | aG to aA | alpha (AP2) | splice acceptor |
| *apa-2* | *ox505* | tgG to tgA | alpha (AP2) | W255stop |
| *apa-2* | (lost) | tgG to tgA | alpha (AP2) | W255stop |
| *apa-2* | *ox507* | Caa to Taa | alpha (AP2) | Q747stop |
| *apa-2* | *ox503* | Cag to Tag | alpha (AP2) | Q838stop |
| *fcho-1* | *ox500* | Caa to Taa | FCHO-1 | Q634stop |
| *fcho-1* | *ox504* | gga to ggGa insertion | FCHO-1 | frameshift (A706S)  stop at +30 residues |
| *fcho-1* | *ox619* | Aaa to Taa | FCHO-1 | K782stop |
| *fcho-1* | *ox620* | tgG to tgA | FCHO-1 | W882stop |
| *fcho-1* | *dx34** | 12 kb deletion | FCHO-1, VIG-1, and JIP-1 | deletes last 5 exons of *fcho-1*, all of *vig-1*, and first 3 exons of *jip-1* |

* independently identified “jowls” mutant
