# Supplementary material for: The membrane-associated proteins FCHo and SGIP are allosteric activators of the AP2 clathrin adaptor complex
Source: eLife journal article supplement (doi:10.7554/elife.03648), 2014-10-10
Supplement: supp [file elife_poa_e03648_Figure_7_figure_supplement_2.xls]

## Sheet: Sheet1
Figure 7-figure supplement 2. Top Proteins Detected by MudPIT Analysis
Mm FCho2 APA (Rank)	Mm FCho2 FL (Rank)	Mm FCho2 ΔBAR (Rank)	Mm SGIP1 APA (Rank)	Mm SGIP1 FL (Rank)	Description	NCBI Gene Name	Mm FCho2 APA #1 %dNSAF	Mm FCho2 APA #2 %dNSAF	Mm FCho2 APA #3 %dNSAF	Mm FCho2 FL %dNSAF	Mm FCho2 ΔBAR %dNSAF	Mm SGIP1 APA #1 %dNSAF	Mm SGIP1 APA #2 %dNSAF	Mm SGIP1 APA #3 %dNSAF	Mm SGIP1 FL %dNSAF	Mm FCho1 APA #1 %dNSAF	Mm FCho1 APA #2 %dNSAF	Mm FCho1 APA #3 %dNSAF	Ce FCHO-1 APA %dNSAF	Control #1 %dNSAF	Control #2 %dNSAF	Control #3 %dNSAF
					FCHo2 APA [M. musculus]		58.1696	45.7064	47.9879	X	X	X	X	X	X	X	X	X	X	X	X	X
					FCHo2 Full Length [M. musculus]		X	X	X	43.9171	1.26434	X	X	X	X	X	X	X	X	X	X	X
					FCHo2 without BAR [M. musculus]		X	X	X	X	49.3789	X	X	X	X	X	X	X	X	X	X	X
					SGIP1 APA [M. musculus]		X	X	X	X	X	63.7873	66.7618	66.6216	X	X	0.274556	X	X	X	X	X
					SGIP1 Full Length [M. musculus]		X	X	X	X	X	X	X	X	50.7288	X	X	X	X	X	X	X
					FCHo1 APA [M. musculus]		X	X	X	X	X	X	X	X	X	55.7635	73.1106	37.834	X	X	X	X
					FCHO-1 APA [C. elegans]		X	X	X	X	X	X	X	X	X	X	X	X	69.0385	X	X	X
1	5	8	1	5	AP-2 complex subunit mu isoform b [H. sapiens]	AP2M1	1.68016	3.49611	1.54801	1.25343	1.0631	5.43968	3.16137	2.09638	2.14563	X	X	X	0.405131	X	X	X
2	2	1	2	1	AP-2 complex subunit beta isoform b [H. sapiens]	AP2B1	1.62398	1.88879	1.91027	2.66256	3.04857	3.08555	1.43178	2.02139	4.10945	X	X	X	0.190097	X	X	X
3	9	7	3	6	AP-2 complex subunit alpha-1 isoform 1 [H. sapiens]	AP2A1	1.48706	1.98498	0.935823	1.05026	1.48289	2.64096	1.11631	1.9895	2.08474	X	X	X	0.17817	X	X	X
4	4	6	4	7	AP-2 complex subunit sigma isoform AP17 [H. sapiens]	AP2S1	0.93151	1.44296	0.794286	1.67216	1.50983	2.4237	1.03528	1.12998	0.981399	X	X	X	0.114034	X	X	X
7	8	10	5	3	AP-2 complex subunit alpha-2 isoform 2 [H. sapiens]	AP2A2	0.445761	0.698379	0.506601	1.06534	0.772013	1.43284	0.446051	1.07126	2.93626	X	0.000982	X	0.091151	X	X	X
5	10	9	8	196	AP-2 complex subunit alpha-2 isoform 1 [H. sapiens]	AP2A2	0.445287	0.697636	0.708486	0.851363	1.02825	0.795176	0.473425	0.944227	X	X	0.000981	X	0.06829	X	X	X
9	12	17	9	12	AP-1 complex subunit beta-1 isoform a [H. sapiens]	AP1B1	0.27387	0.403777	0.426364	0.409329	0.249174	0.636741	0.242078	0.322993	0.38446	X	X	X	0.005688	X	X	X
6	113	13	11	198	WD repeat-containing protein 48 [H. sapiens]	WDR48	0.427401	0.767942	0.495042	0.016702	0.344628	0.238298	0.35598	0.304731	X	0.030138	0.038121	0.043152	0.071755	X	X	X
8	44	19	24	208	phosphatidylinositol 5-phosphate 4-kinase type-2 gamma isoform a [H. sapiens]	PIP4K2C	0.137459	0.581133	0.405687	0.053715	0.119824	0.025547	0.062969	0.103451	X	0.036348	0.030651	0.099131	0.089746	X	X	X
10	395	456	80	252	phosphatidylinositol 5-phosphate 4-kinase type-2 beta [H. sapiens]	PIP4K2B	0.286445	0.422239	0.31396	X	X	0.025854	X	0.060612	X	X	0.01418	X	0.045412	X	X	X
12	1	4	6	4	epidermal growth factor receptor substrate 15 isoform A [H. sapiens]	EPS15	0.295256	0.494912	0.187022	2.72578	2.055	1.50644	0.468011	0.524455	2.65445	X	X	X	X	X	X	X
18	3	2	13	2	epidermal growth factor receptor substrate 15-like 1 isoform 1 [H. sapiens]	EPS15L1	0.031797	0.339428	0.070825	2.62793	2.53616	0.372294	0.267482	0.083126	3.40995	X	X	X	X	X	X	X
45	6	3	371	15	sorting nexin-9 [H. sapiens]	SNX9	0.020842	0.118217	0.032496	1.24472	2.32094	X	X	X	0.171759	X	X	X	X	X	X	X
23	7	5	372	506	FCH domain only protein 2 isoform a [H. sapiens]	FCHO2	0.1639	0.200787	0.025144	1.17923	1.68286	X	X	X	X	X	X	X	X	X	X	X
278	11	14	112	9	intersectin-1 isoform ITSN-l [H. sapiens]	ITSN1	X	0.014216	X	0.586727	0.302038	X	0.018485	0.018076	0.85585	X	X	X	X	X	X	X
483	13	11	134	13	intersectin-2 isoform 1 [H. sapiens]	ITSN2	X	X	X	0.394417	0.399697	X	0.012497	0.007333	0.358381	X	X	X	X	X	X	X
46	413	466	7	195	adaptin ear-binding coat-associated protein 2 isoform 1 [H. sapiens]	NECAP2	0.125736	0.034885	X	X	X	1.30861	0.907181	0.156884	X	X	X	X	0.020523	X	X	X
13	396	58	10	197	serine/threonine-protein kinase PLK1 [H. sapiens]	PLK1	0.185086	0.410805	0.224455	X	0.020915	0.133771	0.415653	0.372538	X	X	X	X	0.022378	X	X	X
648	821	843	683	8	SH3-containing GRB2-like protein 3-interacting protein 1 [H. sapiens]	SGIP1	X	X	X	X	X	X	X	X	0.855919	X	X	X	X	X	X	X
649	822	844	684	10	growth factor receptor-bound protein 2 isoform 1 [H. sapiens]	GRB2	X	X	X	X	X	X	X	X	0.813461	X	X	X	X	X	X	X
